# Supplementary material
Source: publisher figshare collection journal article supplement (https://wiley.figshare.com/articles/dataset/_/3564447)
Supplement: Supplementary file 1 [file 1]

## Appendix B: Stability of the null model

The Jacobian matrix, which consists of partial derivatives of the differential equations, is:

$$\mathbf{J} = \begin{pmatrix} -(h+r) & 0 & 0 & \cdots & 0 \\ \vdots & \vdots & \vdots & \ddots & \vdots \\ -cy_i & 0 & \cdots & c(1-x_\phi) - h - 2cy_i & 0 \\ \vdots & \vdots & \vdots & \vdots & \vdots \end{pmatrix} \quad (\text{B.1})$$

Because the determinant for this matrix is just the product of the diagonal entries, the eigenvalues of the Jacobian are described by

$$0 = [-(h+r) - \lambda] \prod_{i=1}^S [c(1-x_\phi) - h - 2cy_i - \lambda]. \quad (\text{B.2})$$

The  $y_i$ s are equivalent for all  $i$ , so we can simplify to

$$0 = [-(h+r) - \lambda] [c(1-x_\phi) - h - 2cy_i - \lambda]^S. \quad (\text{B.3})$$

$\lambda$  thus can take two values,  $-(r+h)$  or  $c(1-x_\phi) - h - 2cy_i$ . The first is always negative, since  $r$  and

$h$  are non-negative. When  $y_i = 0$ ,  $\lambda = \left( \frac{cr}{r+h} - h \right)$  is negative (and thus this solution is locally

stable) whenever  $c < h(r+h)/r$ . The other solution is  $y_i = r/(r+h) - h/c$ , at which the dominant eigenvalue is

$$\lambda = c \frac{r}{r+h} - h - 2c \left( \frac{r}{r+h} - \frac{h}{c} \right). \quad (\text{B.4})$$

Setting  $\lambda < 0$ , we find that this solution is stable when  $c > h(r+h)/r$ .
