# Supplementary material
Source: publisher figshare collection journal article supplement (https://wiley.figshare.com/articles/dataset/_/3564447)
Supplement: Supplementary file 4 [file 1]

## Appendix C: Solutions and stability of the facilitation model

Eqs. 25 and 26–28 are set to zero to solve for the equilibria.  $x_\phi^*$  is the same as in the null model and is equal to  $h / (r + h)$ . We then solve for the equilibrium of the next highest state,  $x_0^*$ . The roots of the quadratic are

$$x_0 = \frac{r}{r+h} \text{ and } \frac{h}{c_1}. \quad (\text{C.1})$$

$x_0^* = h / c_1$  when  $x_l > 0$ . Because when  $x_0 = r / (r + h)$ ,  $x_\phi + x_0 = 1$ , only the second solution makes sense if there are patches in other states.

We repeat the same procedure to solve for  $x_1$ , using  $x_0 = h / c_1$ ; the roots are

$$x_1^* = \frac{r}{r+h} - \frac{h}{c_1} \text{ and } \frac{h}{c_2}. \quad (\text{C.2})$$

Again, the first solution corresponds to a case in which species 2 (and above) are absent. Because of this structure, we can solve for an arbitrary  $i$ .

$$\frac{dx_i}{dt} = 0 = -c_{i+1}x_i \left( \sum_{j=i+1}^S x_j \right) + c_i x_{i-1} \left( \sum_{j=1}^S x_j \right) - hx_i \quad (\text{C.3})$$

$$0 = -c_{i+1}x_i \left( 1 - x_\phi - \sum_{j=0}^i x_j \right) + c_i x_{i-1} \left( 1 - x_\phi - \sum_{j=0}^{i-1} x_j \right) - hx_i \quad (\text{C.4})$$

$$0 = -c_{i+1}x_i \left[ \frac{r}{r+h} - h \left( \sum_{j=1}^S \frac{1}{c_j} \right) - x_i \right] + c_i \frac{h}{c_i} \left[ \frac{r}{r+h} - h \left( \sum_{j=1}^S \frac{1}{c_j} \right) \right] - hx_i \quad (\text{C.5})$$

$x_i^*$  is either

$$x_i = \frac{r}{r+h} - h \sum_{j=1}^S \frac{1}{c_j} \quad (\text{C.6})$$

$$x_i = \frac{h}{c_{i+1}}. \quad (\text{C.7})$$

If  $x_i = \frac{h}{c_i}$  pushes the sum of all uninhabitable and lower hierarchy patches higher than one, the

first solution must hold. Alternatively  $\frac{r}{r+h} - h \sum_{j=1}^S \frac{1}{c_j}$  must always be non-negative, since this

expresses the proportion of patches ‘left over’ for state  $i$ . When  $c_i = c$ , this simplifies to

$c \geq i \frac{h}{r}(r+h)$ . The highest species number that can persist,  $S^*$  is

$$S^* = \min \left( S, \mathbf{d} \frac{cr}{h(r+h)} \mathbf{t} \right) \quad (\text{C.8})$$

Thus, for that case, the total solution is expressed as

$$\mathbf{x}^* = \left[ \frac{h}{r+h}, \frac{h}{c}, \frac{h}{c}, \dots, \frac{r}{r+h} - \frac{S^*h}{c}, 0, \dots \right]. \quad (\text{C.9})$$

Cases in which  $c_i$  is not the same among species follow a similar pattern. To test local stability,

we constructed the Jacobian,  $\mathbf{J}$ , for this system:

$$\begin{bmatrix} -(h + c \sum_{i=1}^S x_i) - r & -cx_0 - r & -cx_0 - r & \dots & -cx_0 - r \\ 0 & c \sum_{j=i}^S x_j & -(h + c \sum_{j=i+1}^S x_j) + cx_{i-1} & c(x_{i-1} - x_i) & \dots \\ \vdots & \ddots & \ddots & \ddots & \vdots \\ 0 & 0 & 0 & cx_S & -h + cx_{s-1} \end{bmatrix} \quad (\text{C.10})$$

We substituted the solutions from Eq. C.9 for systems with randomly generated parameter values for  $S, r, c$  over harvest rates ranging from zero to 10. The eigenvalues, calculated with MATLAB, were always negative for these solutions, while other solutions (specifically, that for  $S^*$  one species lower) were unstable.
